# Supplementary material for: Text Messaging for Exercise Promotion in Older Adults From an Upper-Middle-Income Country: Randomized Controlled Trial
Source: PubMed Central journal article supplement (PMC4722227; doi:10.2196/jmir.5235), 2016-01-07
Supplement: jmir_v18i1e5_app3.pdf [file jmir_v18i1e5_app3.pdf]

## Semi-Structured Interviews (Focus: Text Messages)

### Week 12 interview

Introductory Question: “Could you describe your experiences with the myPAthS exercise program?”

#### Themes

|                                                                                                                                                                                                                                                                                                                                            |
|--------------------------------------------------------------------------------------------------------------------------------------------------------------------------------------------------------------------------------------------------------------------------------------------------------------------------------------------|
| a) How was your experience with the program (difficulty/ease)? <ul style="list-style-type: none"><li>• Feedback on recording the exercise routine.</li></ul>                                                                                                                                                                               |
| b) What do you think about the exercises? <ul style="list-style-type: none"><li>• Opinion about difficulty/appropriateness</li><li>• Effectiveness (what did you feel?)</li><li>• What would you change?</li></ul>                                                                                                                         |
| c) Share some thoughts about the text messages (SMS texting arm only) <ul style="list-style-type: none"><li>• How much (if at all) did the text messages help you to exercise?</li><li>• How/Why did it help/not help you?</li><li>• What did you mostly do with the text messages?</li><li>• What about the content and amount?</li></ul> |
| d) Recommendations/Suggestions (from participant)                                                                                                                                                                                                                                                                                          |

“Is there anything you would like to add?”

### Week 24 interview

Introductory Question: “Could you describe your experiences with the myPAthS exercise program?”

#### Themes

|                                                                                                                                                                                                                                                                                                            |
|------------------------------------------------------------------------------------------------------------------------------------------------------------------------------------------------------------------------------------------------------------------------------------------------------------|
| a) Experiences over the second period <ul style="list-style-type: none"><li>• How easy or difficult was it for you to do it (initially and then after a longer time)?</li><li>• Describe changes in how you did the exercise compared to the first period</li></ul>                                        |
| b) Text messages (only SMS texting arm) <ul style="list-style-type: none"><li>• Could you describe some differences between the time you received text messages and the time you did not receive text messages?<ul style="list-style-type: none"><li>• Did you miss the text messages?</li></ul></li></ul> |
| c) Future <ul style="list-style-type: none"><li>• Final conclusion/feedback about whole study</li></ul>                                                                                                                                                                                                    |
| d) Recommendations/Suggestions                                                                                                                                                                                                                                                                             |

“Is there anything you would like to add?”
