# Supplementary material for: Text Messaging for Exercise Promotion in Older Adults From an Upper-Middle-Income Country: Randomized Controlled Trial
Source: PubMed Central journal article supplement (PMC4722227; doi:10.2196/jmir.5235), 2016-01-07
Supplement: jmir_v18i1e5_app4.pdf [file jmir_v18i1e5_app4.pdf]

## Per protocol analysis

### *Weekly Exercise Frequency*

On average, over the 12-week intervention period, the SMS texting arm participants exercised more frequently per week (mean 3.74, SD 1.34) compared to non-SMS texting arm participants (mean 2.52, SD 1.85). This difference (mean difference 1.21, bias-corrected and accelerated [BCa] 95% CI 0.18-2.24) was significant ( $t_{37}=2.30$ ,  $P=.03$   $d=0.76$ ). The effect of the SMS text messages on weekly exercise frequency was stronger after adjusting for baseline exercise self-efficacy with ANCOVA ( $F_{1,36}=6.81$ ,  $P=.01$ ).

Weekly exercise frequency decreased by 0.47 sessions (95% CI 0.15-0.79) from week 12 to week 24 in the overall sample ( $F_{1,35}=8.74$ ,  $P=.006$ ). There was no significant research arm by time interaction on weekly exercise frequency ( $F_{1,35}=3.09$ ,  $P=.09$ ). However, simple effects analysis revealed a significant decrease of 0.8 sessions within the SMS texting arm ( $F_{1,35}=9.79$ ,  $P=.004$ ), whereas no significant decrease was observed in the non-SMS texting arm ( $F_{1,37}=0.85$ ,  $P=.36$ ). Further, an independent  $t$  test revealed that the SMS texting arm participants did not exercise more frequently (mean 2.91, SD 1.09) than the non-SMS texting arm participants (mean 2.33, SD 1.92) at week 24. The difference between the 2 arms (mean difference 0.58, BCa 95% CI -0.35 to 1.55) was not significant at week 24 ( $t_{32.7}=1.16$ ,  $P=.26$ ,  $d=0.39$ ).

### *Secondary Outcomes*

Table 2 lists the effects of the SMS text messages on exercise self-efficacy, PA-related energy expenditure, daily sitting hours, BMI, grip strength, and lower body strength adjusted for the baseline values. There were no significant main or interaction effects ( $P>.05$ ).

Table 2. Treatment effects on secondary outcomes.

| Outcome                                                      | SMS texting, mean (SD)<br>(n=16) |                                      |                                      | Non-SMS texting, mean (SD)<br>(n=21) |                                      |                                      | Week 12                                         |          | Week 24                                            |          |
|--------------------------------------------------------------|----------------------------------|--------------------------------------|--------------------------------------|--------------------------------------|--------------------------------------|--------------------------------------|-------------------------------------------------|----------|----------------------------------------------------|----------|
|                                                              | Baseline                         | Change<br>to week<br>12 <sup>a</sup> | Change<br>to week<br>24 <sup>a</sup> | Baseline                             | Change<br>to week<br>12 <sup>a</sup> | Change<br>to week<br>24 <sup>a</sup> | Adjusted<br>difference <sup>a</sup><br>(95% CI) | <i>P</i> | Adjusted<br>difference <sup>a</sup><br>(95%<br>CI) | <i>P</i> |
| Exercise self-efficacy score                                 | 82.73<br>(18.48)                 | -5.62<br>(20.08)                     | -1.76<br>(26.08)                     | 81.55<br>(17.53)                     | -9.94<br>(20.06)                     | -14.37<br>(26.06)                    | -4.32 (-<br>17.86,<br>9.22)                     | .51      | -12.61 (-<br>30.20,<br>4.97)                       | .15      |
| PA-related energy expenditure (weekly MET-minutes)           | 672.80(<br>528.48)               | 405.43<br>(862.04)                   | 461.12<br>(742.44)                   | 968.71<br>(1479.10)                  | 367.18<br>(860.58)                   | 163.22<br>(742.55)                   | -38.25 (-<br>621.66,<br>545.16)                 | .86      | -297.90<br>(-800.37,<br>204.57)                    | .24      |
| Daily sitting time (hours)                                   | 7.50<br>(3.56)                   | -0.35<br>(2.16)                      | -0.03<br>(1.92)                      | 8.52<br>(2.20)                       | -1.21<br>(2.15)                      | -0.84<br>(1.92)                      | -0.87 (-<br>2.32, 0.59)                         | .24      | -0.81 (-<br>2.11,<br>0.49)                         | .21      |
| BMI (kg/m <sup>2</sup> )                                     | 24.09<br>(3.20)                  | 0.17<br>(0.48)                       | 0.07<br>(0.68)                       | 22.39<br>(2.81)                      | 0.32<br>(0.50)                       | 0.29<br>(0.69)                       | 0.15 (-<br>0.19, 0.49)                          | .37      | 0.22 (-<br>0.25,<br>0.68)                          | .36      |
| Grip strength (kg)                                           | 26.09<br>(9.04)                  | 0.27<br>(2.04)                       | 1.53<br>(2.60)                       | 25.51<br>(6.34)                      | 0.30<br>(2.02)                       | 1.08<br>(2.56)                       | 0.03 (-<br>1.34, 1.39)                          | .97      | -0.45 (-<br>2.19,<br>1.30)                         | .61      |
| Lower body strength (repetitions in 30-sec chair-stand test) | 12.56<br>(2.40)                  | 2.89<br>(3.40)                       | 4.31<br>(2.72)                       | 14.90<br>(3.81)                      | 2.70<br>(3.34)                       | 3.43<br>(2.70)                       | -0.19 (-<br>2.53, 2.15)                         | .87      | -0.88 (-<br>2.76,<br>0.99)                         | .35      |

<sup>a</sup> Adjusted for baseline
